# Supplementary material for: Visualising the Experimentally Uncharted Territories of Membrane Protein Structures inside Protein Data Bank
Source: Preprints.org preprint supplement (doi:10.20944/preprints202001.0147.v1), 2020-01-15
Supplement: Supplementary file 1 [file supplementary]

|                                                 |                              |
|-------------------------------------------------|------------------------------|
| <b>Total number of membrane proteins in PDB</b> | <b>9666</b>                  |
| <b>Classification type</b>                      | <b>ORGANISM</b>              |
| Homo sapiens                                    | 3074                         |
| Escherichia coli                                | 968                          |
| Mus musculus                                    | 724                          |
| Rattus norvegicus                               | 595                          |
| Saccharomyces cerevisiae                        | 271                          |
| Bos taurus                                      | 207                          |
| Pseudomonas aeruginosa                          | 155                          |
| Other                                           | 4057                         |
| <b>Classification type</b>                      | <b>UNIPROT MOLECULE NAME</b> |
| Beta-secretase 1                                | 374                          |
| Uncharacterized protein                         | 206                          |
| Glutamate receptor 2                            | 184                          |
| Genome polyprotein                              | 125                          |
| Bacteriorhodopsin                               | 121                          |
| Reaction center protein M Chain                 | 100                          |
| Reaction center protein L Chain                 | 100                          |
| <b>Classification type</b>                      | <b>TAXONOMY</b>              |
| Eukaryota                                       | 5798                         |
| Bacteria                                        | 3168                         |
| Viruses                                         | 913                          |
| Archaea                                         | 348                          |
| Other                                           | 119                          |
| Unassigned                                      | 36                           |
| <b>Classification type</b>                      | <b>EXPERIMENTAL METHOD</b>   |
| X-ray                                           | 7872                         |
| Solution NMR                                    | 965                          |
| Electron Microscopy                             | 731                          |
| Solid-State NMR                                 | 38                           |
| Electron Crystallography                        | 28                           |
| Fiber Diffraction                               | 19                           |
| Hybrid                                          | 9                            |
| Solution Scattering                             | 2                            |
| Other                                           | 2                            |
| <b>Classification type</b>                      | <b>X-RAY RESOLUTION</b>      |
| less than 1.5 Å                                 | 329                          |
| 1.5 - 2.0 Å                                     | 1858                         |
| 2.0 - 2.5 Å                                     | 2167                         |

|                           |                       |
|---------------------------|-----------------------|
| 2.5 - 3.0 Å               | 1899                  |
| 3.0 Å and higher          | 1620                  |
| Classification type       | RELEASE DATE          |
| before 2000               | 294                   |
| 2000 - 2005               | 727                   |
| 2005 - 2010               | 2603                  |
| 2010 - 2015               | 3058                  |
| 2015 - September 25, 2019 | 2984                  |
| Classification type       | ENZYME CLASSIFICATION |
| Hydrolases                | 1215                  |
| Transferases              | 742                   |
| Oxidoreductases           | 518                   |
| Translocases              | 307                   |
| Isomerases                | 89                    |
| Lyases                    | 70                    |
| Ligases                   | 10                    |

**Table 1** A statistical summary of experimentally determined membrane protein structures deposited in the Protein Data Bank as of September 25, 2019.
