# Supplementary material for: Visualising the Experimentally Uncharted Territories of Membrane Protein Structures inside Protein Data Bank
Source: Preprints.org preprint supplement (doi:10.20944/preprints202001.0147.v1), 2020-01-15
Supplement: Supplementary file 2 [file supplementary]

# 1

## Supplementary materials

### 1.1 Amino acid sequence alignments

---

For the four amino acid sequence alignments below, **5GJV\_A\_Fasta** represents the amino acid sequence (in fasta format) for the Chain A in the protein structure (PDB ID: 5GJV), while **5GJW\_A\_Fasta** represents the amino acid sequence (in fasta format) for the Chain A in the protein structure (PDB ID: 5GJW).

**5gjb.pdb\_1276** represents the amino acid sequence (in fasta format) for the Chain A in the protein structure (PDB ID: 5GJV) extracted from the PDB file 5gjb.pdb, and 1276 represents the total number of amino acid residues whose atomic coordinates were experimentally determined.

**5gjw.pdb\_1291** represents the amino acid sequence (in fasta format) for the Chain A in the protein structure (PDB ID: 5GJW) extracted from the PDB file 5gjw.pdb, and 1291 represents the total number of amino acid residues whose atomic coordinates were experimentally determined.

|              |                                       |     |
|--------------|---------------------------------------|-----|
| 5GJV_A_Fasta | MEPSSPQDEGLRKKQPKKPLPEVLPRPPRALFCLT   | 35  |
| 5GJW_A_Fasta | MEPSSPQDEGLRKKQPKKPLPEVLPRPPRALFCLT   | 35  |
| 5GJV_A_Fasta | LQNPLRKACISIVEWKPFETIILLTIFANCVALAV   | 70  |
| 5GJW_A_Fasta | LQNPLRKACISIVEWKPFETIILLTIFANCVALAV   | 70  |
| 5GJV_A_Fasta | YLPMPEDDNNNSLNLGLEKLEYFFLTVFSIEAAMKI  | 105 |
| 5GJW_A_Fasta | YLPMPEDDNNNSLNLGLEKLEYFFLTVFSIEAAMKI  | 105 |
| 5GJV_A_Fasta | IAYGFLFHQDAYLRSGWNVLDFFIIVFLGVFTAILE  | 140 |
| 5GJW_A_Fasta | IAYGFLFHQDAYLRSGWNVLDFFIIVFLGVFTAILE  | 140 |
| 5GJV_A_Fasta | QVNVIQSNTAPMSSKGAGLDVKALRAFRVLRPLRL   | 175 |
| 5GJW_A_Fasta | QVNVIQSNTAPMSSKGAGLDVKALRAFRVLRPLRL   | 175 |
| 5GJV_A_Fasta | VSGVPSLQVVLNSIFKAMLPLFHIALLVLFMVIIY   | 210 |
| 5GJW_A_Fasta | VSGVPSLQVVLNSIFKAMLPLFHIALLVLFMVIIY   | 210 |
| 5GJV_A_Fasta | AIIGLELFGKGMHKTCYYIGTDIVATVENEKPSPC   | 245 |
| 5GJW_A_Fasta | AIIGLELFGKGMHKTCYYIGTDIVATVENEKPSPC   | 245 |
| 5GJV_A_Fasta | ARTGSGRPCTINGSECRGGWPGPNHGITHFDNFGF   | 280 |
| 5GJW_A_Fasta | ARTGSGRPCTINGSECRGGWPGPNHGITHFDNFGF   | 280 |
| 5GJV_A_Fasta | SMLTVYQCITMEGWTDVLYWVND AIGNEW PWIYFV | 315 |
| 5GJW_A_Fasta | SMLTVYQCITMEGWTDVLYWVND AIGNEW PWIYFV | 315 |
| 5GJV_A_Fasta | TLILLGSFFILNLVLGVLSGEFTKEREKAKSRGTF   | 350 |
| 5GJW_A_Fasta | TLILLGSFFILNLVLGVLSGEFTKEREKAKSRGTF   | 350 |
| 5GJV_A_Fasta | QKLREKQOLEEDLRGYMSWITQGEVMDVEDLREGK   | 385 |
| 5GJW_A_Fasta | QKLREKQOLEEDLRGYMSWITQGEVMDVEDLREGK   | 385 |
| 5GJV_A_Fasta | LSLEEGGSDTESLYEIEGLNKIIQFIRHWRQWNRV   | 420 |
| 5GJW_A_Fasta | LSLEEGGSDTESLYEIEGLNKIIQFIRHWRQWNRV   | 420 |
| 5GJV_A_Fasta | FRWKCHDLVKSRVFYWLVLILIVALNTLSIASEHHN  | 455 |
| 5GJW_A_Fasta | FRWKCHDLVKSRVFYWLVLILIVALNTLSIASEHHN  | 455 |
| 5GJV_A_Fasta | QPLWLTHLQDIANRVLLSLFTIEMLLKMYGLGLRQ   | 490 |
| 5GJW_A_Fasta | QPLWLTHLQDIANRVLLSLFTIEMLLKMYGLGLRQ   | 490 |
| 5GJV_A_Fasta | YFMSIFNRFDCFVVCSGILELLLVESGAMTPLGIS   | 525 |
| 5GJW_A_Fasta | YFMSIFNRFDCFVVCSGILELLLVESGAMTPLGIS   | 525 |
| 5GJV_A_Fasta | VLRCIRLLRLFKITKYWTSLSNLVASLLNSIRSIA   | 560 |
| 5GJW_A_Fasta | VLRCIRLLRLFKITKYWTSLSNLVASLLNSIRSIA   | 560 |

|              |                                      |      |
|--------------|--------------------------------------|------|
| 5GJV_A_Fasta | SLLLLLFLFIIIFALLGMQLFGGRYDFEDTEVRRS  | 595  |
| 5GJW_A_Fasta | SLLLLLFLFIIIFALLGMQLFGGRYDFEDTEVRRS  | 595  |
| 5GJV_A_Fasta | NFDNFPQALISVFQVLTGEDWNSVMYNGIMAYGGP  | 630  |
| 5GJW_A_Fasta | NFDNFPQALISVFQVLTGEDWNSVMYNGIMAYGGP  | 630  |
| 5GJV_A_Fasta | SYPGVLVCIYFIIILFVCGNYILLNVFLAIAVDNLA | 665  |
| 5GJW_A_Fasta | SYPGVLVCIYFIIILFVCGNYILLNVFLAIAVDNLA | 665  |
| 5GJV_A_Fasta | EAESLTSAQKAKAEERKRRKMSRGLPDKTEEEKSV  | 700  |
| 5GJW_A_Fasta | EAESLTSAQKAKAEERKRRKMSRGLPDKTEEEKSV  | 700  |
| 5GJV_A_Fasta | MAKKLEQKPKGEGIPTTAKLKVDEFESNVNEVKDP  | 735  |
| 5GJW_A_Fasta | MAKKLEQKPKGEGIPTTAKLKVDEFESNVNEVKDP  | 735  |
| 5GJV_A_Fasta | YPSADFPGDDEEDEPEIPVSPRPRPLAELQLKEKA  | 770  |
| 5GJW_A_Fasta | YPSADFPGDDEEDEPEIPVSPRPRPLAELQLKEKA  | 770  |
| 5GJV_A_Fasta | VPIPEASSFFIFSPTNKVRVLCHRIVNATWFTNFI  | 805  |
| 5GJW_A_Fasta | VPIPEASSFFIFSPTNKVRVLCHRIVNATWFTNFI  | 805  |
| 5GJV_A_Fasta | LLFILLSSAALAAEDPIRAESVRNQILGYFDIAFT  | 840  |
| 5GJW_A_Fasta | LLFILLSSAALAAEDPIRAESVRNQILGYFDIAFT  | 840  |
| 5GJV_A_Fasta | SVFTVEIVLKMTTYGAFLHKGSGFCRNYFNILDLLV | 875  |
| 5GJW_A_Fasta | SVFTVEIVLKMTTYGAFLHKGSGFCRNYFNILDLLV | 875  |
| 5GJV_A_Fasta | VAVSLISMGLSSTISVVKILRVLRVLRPLRAINR   | 910  |
| 5GJW_A_Fasta | VAVSLISMGLSSTISVVKILRVLRVLRPLRAINR   | 910  |
| 5GJV_A_Fasta | AKGLKHVVQCVFVAIRTIIGNIVLVTTLLQFMFACI | 945  |
| 5GJW_A_Fasta | AKGLKHVVQCVFVAIRTIIGNIVLVTTLLQFMFACI | 945  |
| 5GJV_A_Fasta | GVQLFKGKFFSCNDLSKMTEEECRGYYYVYKDGD   | 980  |
| 5GJW_A_Fasta | GVQLFKGKFFSCNDLSKMTEEECRGYYYVYKDGD   | 980  |
| 5GJV_A_Fasta | TQELRPRQWIHNDHFHDNVLSAMMSLFTVSTFEG   | 1015 |
| 5GJW_A_Fasta | TQELRPRQWIHNDHFHDNVLSAMMSLFTVSTFEG   | 1015 |
| 5GJV_A_Fasta | WPQLLYRAIDSNEEDMGPVYNNRVEMAIFFFIIYII | 1050 |
| 5GJW_A_Fasta | WPQLLYRAIDSNEEDMGPVYNNRVEMAIFFFIIYII | 1050 |
| 5GJV_A_Fasta | LIAFFMMNIFVGFVIVTFQEQGETEYKNCELDKNQ  | 1085 |
| 5GJW_A_Fasta | LIAFFMMNIFVGFVIVTFQEQGETEYKNCELDKNQ  | 1085 |
| 5GJV_A_Fasta | RQCVQYALKARPLRCYIPKNPYQYQVWYVVTSSYF  | 1120 |
| 5GJW_A_Fasta | RQCVQYALKARPLRCYIPKNPYQYQVWYVVTSSYF  | 1120 |

|              |                                      |      |
|--------------|--------------------------------------|------|
| 5GJV_A_Fasta | EYLMFALIMLNTICLGMQHYHQSEEMNHISDILNV  | 1155 |
| 5GJW_A_Fasta | EYLMFALIMLNTICLGMQHYHQSEEMNHISDILNV  | 1155 |
| 5GJV_A_Fasta | AFTIIFTLEMILKLLAFKARGYFGDPWNVDFDLIV  | 1190 |
| 5GJW_A_Fasta | AFTIIFTLEMILKLLAFKARGYFGDPWNVDFDLIV  | 1190 |
| 5GJV_A_Fasta | IGSIIDVILSEIDTFLASSGGLYCLGGGCGNVDPD  | 1225 |
| 5GJW_A_Fasta | IGSIIDVILSEIDTFLASSGGLYCLGGGCGNVDPD  | 1225 |
| 5GJV_A_Fasta | ESARISSAFFRLFRVMRLIKLLSRAEGVRTLLWTF  | 1260 |
| 5GJW_A_Fasta | ESARISSAFFRLFRVMRLIKLLSRAEGVRTLLWTF  | 1260 |
| 5GJV_A_Fasta | IKSFQALPYVALLIVMLFFIYAVIGMQMFGKIALV  | 1295 |
| 5GJW_A_Fasta | IKSFQALPYVALLIVMLFFIYAVIGMQMFGKIALV  | 1295 |
| 5GJV_A_Fasta | DGTQINRNNNFQTFPQAVLLLFRCATGEAWQEILL  | 1330 |
| 5GJW_A_Fasta | DGTQINRNNNFQTFPQAVLLLFRCATGEAWQEILL  | 1330 |
| 5GJV_A_Fasta | ACSYGKLCDPESDYAPGEEYTCGTNFAYYYFISFY  | 1365 |
| 5GJW_A_Fasta | ACSYGKLCDPESDYAPGEEYTCGTNFAYYYFISFY  | 1365 |
| 5GJV_A_Fasta | MLCAFLIINLFFVAVIMDNFDYLTRDWSILGPHHLD | 1400 |
| 5GJW_A_Fasta | MLCAFLIINLFFVAVIMDNFDYLTRDWSILGPHHLD | 1400 |
| 5GJV_A_Fasta | EFKAIWAEYDPEAKGRIKHLDVVTLLRRIQPPLGF  | 1435 |
| 5GJW_A_Fasta | EFKAIWAEYDPEAKGRIKHLDVVTLLRRIQPPLGF  | 1435 |
| 5GJV_A_Fasta | GKFCPHRVACKRLVGMMNPLNSDGTVTFNATLFAL  | 1470 |
| 5GJW_A_Fasta | GKFCPHRVACKRLVGMMNPLNSDGTVTFNATLFAL  | 1470 |
| 5GJV_A_Fasta | VRTALKIKTEGNFEQANEELRAIIKKIWKRTSMKL  | 1505 |
| 5GJW_A_Fasta | VRTALKIKTEGNFEQANEELRAIIKKIWKRTSMKL  | 1505 |
| 5GJV_A_Fasta | LDQVIPPIGDDEVTVGKFYATFLIQEHFRKFMKRO  | 1540 |
| 5GJW_A_Fasta | LDQVIPPIGDDEVTVGKFYATFLIQEHFRKFMKRO  | 1540 |
| 5GJV_A_Fasta | EEYYGYRPKKDTVQIQAGLRTIEEEAAPEIRRTIS  | 1575 |
| 5GJW_A_Fasta | EEYYGYRPKKDTVQIQAGLRTIEEEAAPEIRRTIS  | 1575 |
| 5GJV_A_Fasta | GDLTAEELERAMVEAAMEERIFRRTGGLFGQVDT   | 1610 |
| 5GJW_A_Fasta | GDLTAEELERAMVEAAMEERIFRRTGGLFGQVDT   | 1610 |
| 5GJV_A_Fasta | FLERTNSLPPVMANQRPLQFAEIEEMEELESPVFLE | 1645 |
| 5GJW_A_Fasta | FLERTNSLPPVMANQRPLQFAEIEEMEELESPVFLE | 1645 |
| 5GJV_A_Fasta | DFPQDARTNPLARANTNNANANVAYGNSNHSNNQM  | 1680 |
| 5GJW_A_Fasta | DFPQDARTNPLARANTNNANANVAYGNSNHSNNQM  | 1680 |

|              |                                     |      |
|--------------|-------------------------------------|------|
| 5GJV_A_Fasta | FSSVHCEREFPGEAETPAAGRGALSHSHRALGPHS | 1715 |
| 5GJW_A_Fasta | FSSVHCEREFPGEAETPAAGRGALSHSHRALGPHS | 1715 |
| 5GJV_A_Fasta | KPCAGKLNQGLVQPGMPINQAPPAPCQQPSTDPPE | 1750 |
| 5GJW_A_Fasta | KPCAGKLNQGLVQPGMPINQAPPAPCQQPSTDPPE | 1750 |
| 5GJV_A_Fasta | RGQRRTSLTGSLQDEAPQRRSSEGSTPRRPAPATA | 1785 |
| 5GJW_A_Fasta | RGQRRTSLTGSLQDEAPQRRSSEGSTPRRPAPATA | 1785 |
| 5GJV_A_Fasta | LLIQEALVRGGLDTLAADAGFVTATSQALADACQM | 1820 |
| 5GJW_A_Fasta | LLIQEALVRGGLDTLAADAGFVTATSQALADACQM | 1820 |
| 5GJV_A_Fasta | EPEEVEVAATELLKARESVQGMASVPGSLSRSSL  | 1855 |
| 5GJW_A_Fasta | EPEEVEVAATELLKARESVQGMASVPGSLSRSSL  | 1855 |
| 5GJV_A_Fasta | GSLDQVQGSQETLIPRP                   | 1873 |
| 5GJW_A_Fasta | GSLDQVQGSQETLIPRP                   | 1873 |

☐ non conserved  
☒  $\geq 50\%$  conserved

**Figure 1.1** Amino acid sequence alignment of PDB ID 5GJV (fasta format) and PDB ID 5GJW (fasta format).

|                |                                      |     |
|----------------|--------------------------------------|-----|
| 5g jv.pdb_1276 | .....FCLT                            | 4   |
| 5GJV_A_Fasta   | MEPSSPQDEGLRKKQPKKPLPEVLPRPPRALFCLT  | 35  |
| 5g jv.pdb_1276 | LQNPLRKACISIVEWKPFETIILLTIFANCVALAV  | 39  |
| 5GJV_A_Fasta   | LQNPLRKACISIVEWKPFETIILLTIFANCVALAV  | 70  |
| 5g jv.pdb_1276 | YLPMPEDDNNSLNLGLEKLEYFFLTVFSIEAAMKI  | 74  |
| 5GJV_A_Fasta   | YLPMPEDDNNSLNLGLEKLEYFFLTVFSIEAAMKI  | 105 |
| 5g jv.pdb_1276 | IAYGFLFHQDAYLRSGWNVLDFFIIVFLGVFTAIL. | 108 |
| 5GJV_A_Fasta   | IAYGFLFHQDAYLRSGWNVLDFFIIVFLGVFTAIL  | 140 |
| 5g jv.pdb_1276 | .....VKALRAFRVLRPLRL                 | 123 |
| 5GJV_A_Fasta   | QVNVIQSNTPMSSKGAGLDVKALRAFRVLRPLRL   | 175 |
| 5g jv.pdb_1276 | VSGVPSLQVVLNSIFKAMLPLFHIALLVLFMVIIY  | 158 |
| 5GJV_A_Fasta   | VSGVPSLQVVLNSIFKAMLPLFHIALLVLFMVIIY  | 210 |
| 5g jv.pdb_1276 | AIIGLELFKKGKMHKTCYYIGTDIVATVENEKPSPC | 193 |
| 5GJV_A_Fasta   | AIIGLELFKKGKMHKTCYYIGTDIVATVENEKPSPC | 245 |
| 5g jv.pdb_1276 | ARTGSGRPCTINGSECRGGWPGPNHGITHFDNFGF  | 228 |
| 5GJV_A_Fasta   | ARTGSGRPCTINGSECRGGWPGPNHGITHFDNFGF  | 280 |
| 5g jv.pdb_1276 | SMLTVYQCITMEGWTDVLYWVNDAIGNEWPIYFV   | 263 |
| 5GJV_A_Fasta   | SMLTVYQCITMEGWTDVLYWVNDAIGNEWPIYFV   | 315 |
| 5g jv.pdb_1276 | TLILLGSFFILNLVLGVLSGEFTKEREKAKSRGTF  | 298 |
| 5GJV_A_Fasta   | TLILLGSFFILNLVLGVLSGEFTKEREKAKSRGTF  | 350 |
| 5g jv.pdb_1276 | QKLREKQQLEEDLRGYMSWITQGEVM.....      | 324 |
| 5GJV_A_Fasta   | QKLREKQQLEEDLRGYMSWITQGEVMDVEDLREGK  | 385 |
| 5g jv.pdb_1276 | .....WNRV                            | 328 |
| 5GJV_A_Fasta   | LSLEEGGSDTESLYEIEGLNKIIQFIRHWRQWNRV  | 420 |
| 5g jv.pdb_1276 | FRWKCHDLVKSRVFYWLVLILIVALNTLSIASEHNN | 363 |
| 5GJV_A_Fasta   | FRWKCHDLVKSRVFYWLVLILIVALNTLSIASEHNN | 455 |
| 5g jv.pdb_1276 | QPLWLTHLQDIANRVLLSLFTIEMLLKMYGLGLRQ  | 398 |
| 5GJV_A_Fasta   | QPLWLTHLQDIANRVLLSLFTIEMLLKMYGLGLRQ  | 490 |
| 5g jv.pdb_1276 | YFMSIFNRFDCFVVCSGILELLLVESGAMTPLGIS  | 433 |
| 5GJV_A_Fasta   | YFMSIFNRFDCFVVCSGILELLLVESGAMTPLGIS  | 525 |
| 5g jv.pdb_1276 | VLRCIRLLRLFKITKYWTSLSNLVASLLNSIRSIA  | 468 |
| 5GJV_A_Fasta   | VLRCIRLLRLFKITKYWTSLSNLVASLLNSIRSIA  | 560 |

|                |                                     |      |
|----------------|-------------------------------------|------|
| 5g jv.pdb_1276 | SLLLLLFLFIIIFALLGMQLFGGRYDFEDTEVRRS | 503  |
| 5GJV_A_Fasta   | SLLLLLFLFIIIFALLGMQLFGGRYDFEDTEVRRS | 595  |
| 5g jv.pdb_1276 | NFDNFPQALISVFQVLTGEDWNSVMYNGIMAYGGP | 538  |
| 5GJV_A_Fasta   | NFDNFPQALISVFQVLTGEDWNSVMYNGIMAYGGP | 630  |
| 5g jv.pdb_1276 | SYPGVLVCIYFIILFVCGNYILLNVFLAIAVDNLA | 573  |
| 5GJV_A_Fasta   | SYPGVLVCIYFIILFVCGNYILLNVFLAIAVDNLA | 665  |
| 5g jv.pdb_1276 | EAES.....                           | 577  |
| 5GJV_A_Fasta   | EAESLTSAQKAKAEERKRRKMSRGLPDKTEEEKSV | 700  |
| 5g jv.pdb_1276 | .....                               | 577  |
| 5GJV_A_Fasta   | MAKKLEQKPKGEGIPTTAKLKVDEFESNVNEVKDP | 735  |
| 5g jv.pdb_1276 | .....                               | 577  |
| 5GJV_A_Fasta   | YPSADFPGDDEEDEPEIPVSPRPRPLAELQLKEKA | 770  |
| 5g jv.pdb_1276 | .....VRVLCHRIVNATWFTNFI             | 595  |
| 5GJV_A_Fasta   | VPIPEASSFFIFSPTNKVRVLCHRIVNATWFTNFI | 805  |
| 5g jv.pdb_1276 | LLFILLSSAALAAEDPIRAESVRNQILGYFDIAFT | 630  |
| 5GJV_A_Fasta   | LLFILLSSAALAAEDPIRAESVRNQILGYFDIAFT | 840  |
| 5g jv.pdb_1276 | SVFTVEIVLKMTTYGAFLHKGSFCRNYFNILDLLV | 665  |
| 5GJV_A_Fasta   | SVFTVEIVLKMTTYGAFLHKGSFCRNYFNILDLLV | 875  |
| 5g jv.pdb_1276 | VAVSLISMGL.....VVKILRVLRLRPLRAINR   | 694  |
| 5GJV_A_Fasta   | VAVSLISMGLESSTISVVKILRVLRLRPLRAINR  | 910  |
| 5g jv.pdb_1276 | AKGLKHVVQCVFVAIRTIGNIVLVTTLLQFMFACI | 729  |
| 5GJV_A_Fasta   | AKGLKHVVQCVFVAIRTIGNIVLVTTLLQFMFACI | 945  |
| 5g jv.pdb_1276 | GVQLFKGKFFSCNDLSKMTEEECRGYYYVYKDGP  | 764  |
| 5GJV_A_Fasta   | GVQLFKGKFFSCNDLSKMTEEECRGYYYVYKDGP  | 980  |
| 5g jv.pdb_1276 | TQMELRPRQWIHNDHFHDNVLSAMMSLFTVSTFEG | 799  |
| 5GJV_A_Fasta   | TQMELRPRQWIHNDHFHDNVLSAMMSLFTVSTFEG | 1015 |
| 5g jv.pdb_1276 | WPQLLYRAIDSNEEDMGPVYNNRVEMAIFFIIYII | 834  |
| 5GJV_A_Fasta   | WPQLLYRAIDSNEEDMGPVYNNRVEMAIFFIIYII | 1050 |
| 5g jv.pdb_1276 | LIAFFMMNIFVGFVIVTFQEQGETEYKNCELDKNQ | 869  |
| 5GJV_A_Fasta   | LIAFFMMNIFVGFVIVTFQEQGETEYKNCELDKNQ | 1085 |
| 5g jv.pdb_1276 | RQCVQYALKARPLRCYIPKNPYQYQVWYVVTSSYF | 904  |
| 5GJV_A_Fasta   | RQCVQYALKARPLRCYIPKNPYQYQVWYVVTSSYF | 1120 |



|                |                                      |      |
|----------------|--------------------------------------|------|
| 5g jv.pdb_1276 | EYLMFALIMLNTICLGMQHYHQSEEMNHISDILNV  | 939  |
| 5GJV_A_Fasta   | EYLMFALIMLNTICLGMQHYHQSEEMNHISDILNV  | 1155 |
| 5g jv.pdb_1276 | AFTIIIFTLEMILKLLAFKARGYFGDPWNVDFDLIV | 974  |
| 5GJV_A_Fasta   | AFTIIIFTLEMILKLLAFKARGYFGDPWNVDFDLIV | 1190 |
| 5g jv.pdb_1276 | IGSIIDVILSEIDTF.....                 | 989  |
| 5GJV_A_Fasta   | IGSIIDVILSEIDTF LASSGGLYCLGGGCGNVDPD | 1225 |
| 5g jv.pdb_1276 | ...RISSAFFRLFRVMRLIKLLSRAEGVRTLLWTF  | 1021 |
| 5GJV_A_Fasta   | ESARISSAFFRLFRVMRLIKLLSRAEGVRTLLWTF  | 1260 |
| 5g jv.pdb_1276 | IKSFQALPYVALLIVMLFFIYAVIGMQMFGKIALV  | 1056 |
| 5GJV_A_Fasta   | IKSFQALPYVALLIVMLFFIYAVIGMQMFGKIALV  | 1295 |
| 5g jv.pdb_1276 | DGTQINRNNNFQTFPQAVLLLFRCATGEAWQEILL  | 1091 |
| 5GJV_A_Fasta   | DGTQINRNNNFQTFPQAVLLLFRCATGEAWQEILL  | 1330 |
| 5g jv.pdb_1276 | ACSYGKLCDPESDYAPGEEYTCGTNFAYYYFISFY  | 1126 |
| 5GJV_A_Fasta   | ACSYGKLCDPESDYAPGEEYTCGTNFAYYYFISFY  | 1365 |
| 5g jv.pdb_1276 | MLCAFLIINLFFVAVIMDNFDYLTRDWSILGPHHLD | 1161 |
| 5GJV_A_Fasta   | MLCAFLIINLFFVAVIMDNFDYLTRDWSILGPHHLD | 1400 |
| 5g jv.pdb_1276 | EFKAIWAEYDPEAKGRIKHLDVVTLLRRIQPPLGF  | 1196 |
| 5GJV_A_Fasta   | EFKAIWAEYDPEAKGRIKHLDVVTLLRRIQPPLGF  | 1435 |
| 5g jv.pdb_1276 | GKFCPHRVACKRLVGMNMPLNSDGTVTFNATLFAL  | 1231 |
| 5GJV_A_Fasta   | GKFCPHRVACKRLVGMNMPLNSDGTVTFNATLFAL  | 1470 |
| 5g jv.pdb_1276 | VRTALKIKTEGNFEQANEELRAIIKKIWKRTSMKL  | 1266 |
| 5GJV_A_Fasta   | VRTALKIKTEGNFEQANEELRAIIKKIWKRTSMKL  | 1505 |
| 5g jv.pdb_1276 | LDQVIPPIGD.....                      | 1276 |
| 5GJV_A_Fasta   | LDQVIPPIGDDEVTVGKFYATFLIQEHFRKFMKRQ  | 1540 |
| 5g jv.pdb_1276 | .....                                | 1276 |
| 5GJV_A_Fasta   | EEYYGYRPPKDTVQIQAGLRTIEEEAAPEIRRTIS  | 1575 |
| 5g jv.pdb_1276 | .....                                | 1276 |
| 5GJV_A_Fasta   | GDLTAEELERAMVEAAMEERIFRRTGGLFGQVDT   | 1610 |
| 5g jv.pdb_1276 | .....                                | 1276 |
| 5GJV_A_Fasta   | FLERTNSLPPVMANQRPLQFAEIEEMEELESPVFLE | 1645 |
| 5g jv.pdb_1276 | .....                                | 1276 |
| 5GJV_A_Fasta   | DFPQDARTNPLARANTNNANANVAYGNSNHSNNQM  | 1680 |

```

5g jv.pdb_1276      ..... 1276
5GJV_A_Fasta      FSSVHCEREFPGEAETPAAGRGALSHSHRALGPHS 1715

5g jv.pdb_1276      ..... 1276
5GJV_A_Fasta      KPCAGKLNQQLVQPGMPINQAPPAPCQQPSTDPPE 1750

5g jv.pdb_1276      ..... 1276
5GJV_A_Fasta      RGQRRTSLTGSLQDEAPQRRSSEGSTPRRPAPATA 1785

5g jv.pdb_1276      ..... 1276
5GJV_A_Fasta      LLIQEALVRGGLDTLAADAGFVTATSQALADACQM 1820

5g jv.pdb_1276      ..... 1276
5GJV_A_Fasta      EPEEVEVAATELLKARESVQGMASVPGSLSRSSL 1855

5g jv.pdb_1276      ..... 1276
5GJV_A_Fasta      GSLDQVQGSQETLIPRP 1873

```

☐ non conserved

☒ ≥ 50% conserved

**Figure 1.2** Amino acid sequence alignment of PDB ID **5GJV** (fasta format) and its sequence extracted from the PDB file with an in-house python script, supplementary file **extract-aa.py**.

|                |                                      |     |
|----------------|--------------------------------------|-----|
| 5g jw.pdb_1291 | .....FCLT                            | 4   |
| 5GJW_A_Fasta   | MEPSSPQDEGLRKKQPKKPLPEVLPRPPRALFCLT  | 35  |
| 5g jw.pdb_1291 | LQNPLRKACISIVEWKPFETIILLTIFANCVALAV  | 39  |
| 5GJW_A_Fasta   | LQNPLRKACISIVEWKPFETIILLTIFANCVALAV  | 70  |
| 5g jw.pdb_1291 | YLPMPEDDNNSLNLGLEKLEYFFLTVFSIEAAMKI  | 74  |
| 5GJW_A_Fasta   | YLPMPEDDNNSLNLGLEKLEYFFLTVFSIEAAMKI  | 105 |
| 5g jw.pdb_1291 | IAYGFLFHQDAYLRSGWNVLDFFIIVFLGVFTAIL. | 108 |
| 5GJW_A_Fasta   | IAYGFLFHQDAYLRSGWNVLDFFIIVFLGVFTAIL  | 140 |
| 5g jw.pdb_1291 | .....VKALRAFRVLRPLRL                 | 123 |
| 5GJW_A_Fasta   | QVNVIQSNTPMSSKGAGLDVKALRAFRVLRPLRL   | 175 |
| 5g jw.pdb_1291 | VSGVPSLQVVLNSIFKAMLPLFHIALLVLFMVIIY  | 158 |
| 5GJW_A_Fasta   | VSGVPSLQVVLNSIFKAMLPLFHIALLVLFMVIIY  | 210 |
| 5g jw.pdb_1291 | AIIGLELFKKGKMHKTCYYIGTDIVATVENEKPSPC | 193 |
| 5GJW_A_Fasta   | AIIGLELFKKGKMHKTCYYIGTDIVATVENEKPSPC | 245 |
| 5g jw.pdb_1291 | ARTGSGRPCTINGSECRGGWPGPNHGITHFDNFGF  | 228 |
| 5GJW_A_Fasta   | ARTGSGRPCTINGSECRGGWPGPNHGITHFDNFGF  | 280 |
| 5g jw.pdb_1291 | SMLTVYQCITMEGWTDVLYWVNDAIGNEWPWIIYFV | 263 |
| 5GJW_A_Fasta   | SMLTVYQCITMEGWTDVLYWVNDAIGNEWPWIIYFV | 315 |
| 5g jw.pdb_1291 | TLILLGSFFILNLVLGVLSGEFTKEREKAKSRGTF  | 298 |
| 5GJW_A_Fasta   | TLILLGSFFILNLVLGVLSGEFTKEREKAKSRGTF  | 350 |
| 5g jw.pdb_1291 | QKLREKQQLEEDLRGYMSWITQGEVM.....      | 324 |
| 5GJW_A_Fasta   | QKLREKQQLEEDLRGYMSWITQGEVMDVEDLREGK  | 385 |
| 5g jw.pdb_1291 | .....NRV                             | 327 |
| 5GJW_A_Fasta   | LSLEEGGSDTESLYEIEGLNKIIQFIRHWRQWNRV  | 420 |
| 5g jw.pdb_1291 | FRWKCHDLVKSRVFYWLVLILIVALNTLSIASEHNN | 362 |
| 5GJW_A_Fasta   | FRWKCHDLVKSRVFYWLVLILIVALNTLSIASEHNN | 455 |
| 5g jw.pdb_1291 | QPLWLTHLQDIANRVLLSLFTIEMLLKMYGLGLRQ  | 397 |
| 5GJW_A_Fasta   | QPLWLTHLQDIANRVLLSLFTIEMLLKMYGLGLRQ  | 490 |
| 5g jw.pdb_1291 | YFMSIFNRFDCFVVCSGILELLLVESEGAMTPLGIS | 432 |
| 5GJW_A_Fasta   | YFMSIFNRFDCFVVCSGILELLLVESEGAMTPLGIS | 525 |
| 5g jw.pdb_1291 | VLRCIRLLRLFKITKYWTSLSNLVASLLNSIRSIA  | 467 |
| 5GJW_A_Fasta   | VLRCIRLLRLFKITKYWTSLSNLVASLLNSIRSIA  | 560 |

|                |                                     |      |
|----------------|-------------------------------------|------|
| 5g jw.pdb_1291 | SLLLLLFLFIIIFALLGMQLFGGRYDFEDTEVRRS | 502  |
| 5GJW_A_Fasta   | SLLLLLFLFIIIFALLGMQLFGGRYDFEDTEVRRS | 595  |
| 5g jw.pdb_1291 | NFDNFPQALISVFQVLTGEDWNSVMYNGIMAYGGP | 537  |
| 5GJW_A_Fasta   | NFDNFPQALISVFQVLTGEDWNSVMYNGIMAYGGP | 630  |
| 5g jw.pdb_1291 | SYPGVLVCIYFIILFVCGNYILLNVFLAIAVDNLA | 572  |
| 5GJW_A_Fasta   | SYPGVLVCIYFIILFVCGNYILLNVFLAIAVDNLA | 665  |
| 5g jw.pdb_1291 | EAESLTSAQKAKAEERKRRKM.....          | 593  |
| 5GJW_A_Fasta   | EAESLTSAQKAKAEERKRRKMSRGLPDKTEEEKSV | 700  |
| 5g jw.pdb_1291 | .....                               | 593  |
| 5GJW_A_Fasta   | MAKKLEQKPKGEGIPTTAKLKVDEFESNVNEVKDP | 735  |
| 5g jw.pdb_1291 | .....                               | 593  |
| 5GJW_A_Fasta   | YPSADFPGDDEEDEPEIPVSPRPRPLAELQLKEKA | 770  |
| 5g jw.pdb_1291 | .....VRVLCHRIVNATWFTNFI             | 611  |
| 5GJW_A_Fasta   | VPIPEASSFFIFSPTNKVRVLCHRIVNATWFTNFI | 805  |
| 5g jw.pdb_1291 | LLFILLSSAALAAEDPIRAESVRNQILGYFDIAFT | 646  |
| 5GJW_A_Fasta   | LLFILLSSAALAAEDPIRAESVRNQILGYFDIAFT | 840  |
| 5g jw.pdb_1291 | SVFTVEIVLKMTTYGAFLHKGSFCRNYFNILDLLV | 681  |
| 5GJW_A_Fasta   | SVFTVEIVLKMTTYGAFLHKGSFCRNYFNILDLLV | 875  |
| 5g jw.pdb_1291 | VAVSLISMG.....VVKILRVLRLRPLRAINR    | 709  |
| 5GJW_A_Fasta   | VAVSLISMGLESSTISVVKILRVLRLRPLRAINR  | 910  |
| 5g jw.pdb_1291 | AKGLKHVVQCVFVAIRTIGNIVLVTTLLQFMFACI | 744  |
| 5GJW_A_Fasta   | AKGLKHVVQCVFVAIRTIGNIVLVTTLLQFMFACI | 945  |
| 5g jw.pdb_1291 | GVQLFKGKFFSCNDLSKMTEEECRGYYYVYKDGP  | 779  |
| 5GJW_A_Fasta   | GVQLFKGKFFSCNDLSKMTEEECRGYYYVYKDGP  | 980  |
| 5g jw.pdb_1291 | TQMELRPRQWIHNDHFHDNVLSAMMSLFTVSTFEG | 814  |
| 5GJW_A_Fasta   | TQMELRPRQWIHNDHFHDNVLSAMMSLFTVSTFEG | 1015 |
| 5g jw.pdb_1291 | WPQLLYRAIDSNEEDMGPVYNNRVEMAIFFIIYII | 849  |
| 5GJW_A_Fasta   | WPQLLYRAIDSNEEDMGPVYNNRVEMAIFFIIYII | 1050 |
| 5g jw.pdb_1291 | LIAFFMMNIFVGFVIVTFQEQGETEYKNCELDKNQ | 884  |
| 5GJW_A_Fasta   | LIAFFMMNIFVGFVIVTFQEQGETEYKNCELDKNQ | 1085 |
| 5g jw.pdb_1291 | RQCVQYALKARPLRCYIPKNPYQYQVWYVVTSSYF | 919  |
| 5GJW_A_Fasta   | RQCVQYALKARPLRCYIPKNPYQYQVWYVVTSSYF | 1120 |

|                |                                      |      |
|----------------|--------------------------------------|------|
| 5g jw.pdb_1291 | EYLMFALIMLNTICLGMQHYHQSEEMNHISDILNV  | 954  |
| 5GJW_A_Fasta   | EYLMFALIMLNTICLGMQHYHQSEEMNHISDILNV  | 1155 |
| 5g jw.pdb_1291 | AFTIIIFTLEMILKLLAFKARGYFGDPWNVDFDLIV | 989  |
| 5GJW_A_Fasta   | AFTIIIFTLEMILKLLAFKARGYFGDPWNVDFDLIV | 1190 |
| 5g jw.pdb_1291 | IGSIIDVILSEIDTF.....                 | 1004 |
| 5GJW_A_Fasta   | IGSIIDVILSEIDTF LASSGGLYCLGGGCGNVDPD | 1225 |
| 5g jw.pdb_1291 | ...RISSAFFRLFRVMRLIKLLSRAEGVRTLLWTF  | 1036 |
| 5GJW_A_Fasta   | ESARISSAFFRLFRVMRLIKLLSRAEGVRTLLWTF  | 1260 |
| 5g jw.pdb_1291 | IKSFQALPYVALLIVMLFFIYAVIGMQMFGKIALV  | 1071 |
| 5GJW_A_Fasta   | IKSFQALPYVALLIVMLFFIYAVIGMQMFGKIALV  | 1295 |
| 5g jw.pdb_1291 | DGTQINRNNNFQTFPQAVLLLFRCATGEAWQEILL  | 1106 |
| 5GJW_A_Fasta   | DGTQINRNNNFQTFPQAVLLLFRCATGEAWQEILL  | 1330 |
| 5g jw.pdb_1291 | ACSYGKLCDPESDYAPGEEYTCGTNFAYYYFISFY  | 1141 |
| 5GJW_A_Fasta   | ACSYGKLCDPESDYAPGEEYTCGTNFAYYYFISFY  | 1365 |
| 5g jw.pdb_1291 | MLCAFLIINLFFVAVIMDNFDYLTRDWSILGPHHLD | 1176 |
| 5GJW_A_Fasta   | MLCAFLIINLFFVAVIMDNFDYLTRDWSILGPHHLD | 1400 |
| 5g jw.pdb_1291 | EFKAIWAEYDPEAKGRIKHLDVVTLLRRIQPPLGF  | 1211 |
| 5GJW_A_Fasta   | EFKAIWAEYDPEAKGRIKHLDVVTLLRRIQPPLGF  | 1435 |
| 5g jw.pdb_1291 | GKFCPHRVACKRLVGMNMPLNSDGTVTFNATLFAL  | 1246 |
| 5GJW_A_Fasta   | GKFCPHRVACKRLVGMNMPLNSDGTVTFNATLFAL  | 1470 |
| 5g jw.pdb_1291 | VRTALKIKTEGNFEQANEELRAIIKKIWKRTSMKL  | 1281 |
| 5GJW_A_Fasta   | VRTALKIKTEGNFEQANEELRAIIKKIWKRTSMKL  | 1505 |
| 5g jw.pdb_1291 | LDQVIPPIGD.....                      | 1291 |
| 5GJW_A_Fasta   | LDQVIPPIGDDEVTVGKFYATFLIQEHFRKFMKRQ  | 1540 |
| 5g jw.pdb_1291 | .....                                | 1291 |
| 5GJW_A_Fasta   | EEYYGYRPPKDTVQIQAGLRTIEEEAAPEIRRTIS  | 1575 |
| 5g jw.pdb_1291 | .....                                | 1291 |
| 5GJW_A_Fasta   | GDLTAEELERAMVEAAMEERIFRRTGGLFGQVDT   | 1610 |
| 5g jw.pdb_1291 | .....                                | 1291 |
| 5GJW_A_Fasta   | FLERTNSLPPVMANQRPLQFAEIEEMEELESPVFLE | 1645 |
| 5g jw.pdb_1291 | .....                                | 1291 |
| 5GJW_A_Fasta   | DFPQDARTNPLARANTNNANANVAYGNSNHSNNQM  | 1680 |

```

5g jw.pdb_1291      . . . . . 1291
5GJW_A_Fasta      FSSVHCEREFPGEAETPAAGRGALSHSHRALGPHS 1715

5g jw.pdb_1291      . . . . . 1291
5GJW_A_Fasta      KPCAGKLNGLVQPGMPINQAPPAPCQQPSTDPPE 1750

5g jw.pdb_1291      . . . . . 1291
5GJW_A_Fasta      RGQRRTSLTGSLQDEAPQRRSSEGSTPRRPAPATA 1785

5g jw.pdb_1291      . . . . . 1291
5GJW_A_Fasta      LLIQEALVRGGLDTLAADAGFVTATSQALADACQM 1820

5g jw.pdb_1291      . . . . . 1291
5GJW_A_Fasta      EPEEVEVAATELLKARESVQGMASVPGSLSRSSL 1855

5g jw.pdb_1291      . . . . . 1291
5GJW_A_Fasta      GSLDQVQGSQETLIPRP 1873

```

☐ non conserved  
☒ ≥ 50% conserved

**Figure 1.3** Amino acid sequence alignment of PDB ID **5GJW** (fasta format) and its sequence extracted from the PDB file with an in-house python script, supplementary file **extract-aa.py**.

|                |                                      |     |
|----------------|--------------------------------------|-----|
| 5g jv.pdb_1276 | FCLTLQNPLRKACISIVEWKPFETIILLTIFANCV  | 35  |
| 5g jw.pdb_1291 | FCLTLQNPLRKACISIVEWKPFETIILLTIFANCV  | 35  |
| 5g jv.pdb_1276 | ALAVYLPMPEDDNNSLNLGLEKLEYFFLTVFSIEA  | 70  |
| 5g jw.pdb_1291 | ALAVYLPMPEDDNNSLNLGLEKLEYFFLTVFSIEA  | 70  |
| 5g jv.pdb_1276 | AMKIIAYGFLFHQDAYLRSGWNVLDfIIIVFLGVFT | 105 |
| 5g jw.pdb_1291 | AMKIIAYGFLFHQDAYLRSGWNVLDfIIIVFLGVFT | 105 |
| 5g jv.pdb_1276 | AILVKALRAFRVLRPLRLVSGVPSLQVVLNSIFKA  | 140 |
| 5g jw.pdb_1291 | AILVKALRAFRVLRPLRLVSGVPSLQVVLNSIFKA  | 140 |
| 5g jv.pdb_1276 | MLPLFHIALLVLFMVIIYAIIGLELFFKGMHKTCY  | 175 |
| 5g jw.pdb_1291 | MLPLFHIALLVLFMVIIYAIIGLELFFKGMHKTCY  | 175 |
| 5g jv.pdb_1276 | YIGTDIVATVENEKPSPCARTGSGRPCTINGSECR  | 210 |
| 5g jw.pdb_1291 | YIGTDIVATVENEKPSPCARTGSGRPCTINGSECR  | 210 |
| 5g jv.pdb_1276 | GGWPGPNHGITHFDNFGFSMLTVYQCITMEGWTDV  | 245 |
| 5g jw.pdb_1291 | GGWPGPNHGITHFDNFGFSMLTVYQCITMEGWTDV  | 245 |
| 5g jv.pdb_1276 | LYWVNDAIGNEWPWIYFVTLLLLGSFFILNLVLGV  | 280 |
| 5g jw.pdb_1291 | LYWVNDAIGNEWPWIYFVTLLLLGSFFILNLVLGV  | 280 |
| 5g jv.pdb_1276 | LSGEFTKEREKAKSRGTFQKLREKQOLEEDLRGYM  | 315 |
| 5g jw.pdb_1291 | LSGEFTKEREKAKSRGTFQKLREKQOLEEDLRGYM  | 315 |
| 5g jv.pdb_1276 | SWITQGEVMWNRVFRWKCHDLVKSRVFYWLVLIV   | 350 |
| 5g jw.pdb_1291 | SWITQGEVMNRVFRWKCHDLVKSRVFYWLVLIV    | 349 |
| 5g jv.pdb_1276 | ALNTLSIASSEHHNQPLWLTHLQDIANRVLLSLFTI | 385 |
| 5g jw.pdb_1291 | ALNTLSIASSEHHNQPLWLTHLQDIANRVLLSLFTI | 384 |
| 5g jv.pdb_1276 | EMLLKMYGLGLRQYFMSIFNRFDCFVVCSGILELL  | 420 |
| 5g jw.pdb_1291 | EMLLKMYGLGLRQYFMSIFNRFDCFVVCSGILELL  | 419 |
| 5g jv.pdb_1276 | LVESGAMTPLGISVLR CIRLLRLFKITKYWTSLSN | 455 |
| 5g jw.pdb_1291 | LVESGAMTPLGISVLR CIRLLRLFKITKYWTSLSN | 454 |
| 5g jv.pdb_1276 | LVASLLNSIRS IASLLLLLFLFIIIFALLGMQLFG | 490 |
| 5g jw.pdb_1291 | LVASLLNSIRS IASLLLLLFLFIIIFALLGMQLFG | 489 |
| 5g jv.pdb_1276 | GRYDFEDTEVRRSNFDNFPQALISVFQVLTGEDWN  | 525 |
| 5g jw.pdb_1291 | GRYDFEDTEVRRSNFDNFPQALISVFQVLTGEDWN  | 524 |
| 5g jv.pdb_1276 | SVMYNGIMAYGGPSYPGVLVCIYFIILFVCGNYIL  | 560 |
| 5g jw.pdb_1291 | SVMYNGIMAYGGPSYPGVLVCIYFIILFVCGNYIL  | 559 |

|                |                                      |      |
|----------------|--------------------------------------|------|
| 5g jv.pdb_1276 | LNVFLAIAVDNLAEAES.....V              | 578  |
| 5g jw.pdb_1291 | LNVFLAIAVDNLAEESLTSAQKAKAEERKRRKMV   | 594  |
| 5g jv.pdb_1276 | RVLCHRIVNATWFTNFILLFILLSSAALAAEDPIR  | 613  |
| 5g jw.pdb_1291 | RVLCHRIVNATWFTNFILLFILLSSAALAAEDPIR  | 629  |
| 5g jv.pdb_1276 | AESVRNQILGYFDIAFTSVFTVEIVLKMTTYGAFL  | 648  |
| 5g jw.pdb_1291 | AESVRNQILGYFDIAFTSVFTVEIVLKMTTYGAFL  | 664  |
| 5g jv.pdb_1276 | HKGSFCRNYFNILDLLVAVSLISMGLVVKILRVL   | 683  |
| 5g jw.pdb_1291 | HKGSFCRNYFNILDLLVAVSLISMGLVVKILRVL   | 698  |
| 5g jv.pdb_1276 | RVLRLRAINRAKGLKHVVQCVFVAIRTIGNIVLV   | 718  |
| 5g jw.pdb_1291 | RVLRLRAINRAKGLKHVVQCVFVAIRTIGNIVLV   | 733  |
| 5g jv.pdb_1276 | TTLLOFMFACIGVQLFKGKFFSCNDLSKMTEEECR  | 753  |
| 5g jw.pdb_1291 | TTLLOFMFACIGVQLFKGKFFSCNDLSKMTEEECR  | 768  |
| 5g jv.pdb_1276 | GYYYVYKDGDPQTQELRPRQWIHNDHFHFNVL SAM | 788  |
| 5g jw.pdb_1291 | GYYYVYKDGDPQTQELRPRQWIHNDHFHFNVL SAM | 803  |
| 5g jv.pdb_1276 | MSLFTVSTFEGWPQLLYRAIDSNEEDMGPVYNNRV  | 823  |
| 5g jw.pdb_1291 | MSLFTVSTFEGWPQLLYRAIDSNEEDMGPVYNNRV  | 838  |
| 5g jv.pdb_1276 | EMAIFFIIYIILIAFFMMNIFVGFVIVTFQEQGET  | 858  |
| 5g jw.pdb_1291 | EMAIFFIIYIILIAFFMMNIFVGFVIVTFQEQGET  | 873  |
| 5g jv.pdb_1276 | EYKNCELDKNQRCVQYALKARPLRCYIPKNPYQY   | 893  |
| 5g jw.pdb_1291 | EYKNCELDKNQRCVQYALKARPLRCYIPKNPYQY   | 908  |
| 5g jv.pdb_1276 | QVWYVVTSSYFEYLMFALIMLNTICLGMQHYHQSE  | 928  |
| 5g jw.pdb_1291 | QVWYVVTSSYFEYLMFALIMLNTICLGMQHYHQSE  | 943  |
| 5g jv.pdb_1276 | EMNHISDILNVAFTIIIFTLEMILKLLAFKARGYFG | 963  |
| 5g jw.pdb_1291 | EMNHISDILNVAFTIIIFTLEMILKLLAFKARGYFG | 978  |
| 5g jv.pdb_1276 | DPWNVDFDLIVIGSIIDVILSEIDTFRISSAFFRL  | 998  |
| 5g jw.pdb_1291 | DPWNVDFDLIVIGSIIDVILSEIDTFRISSAFFRL  | 1013 |
| 5g jv.pdb_1276 | FRVMRLIKLLSRAEGVRTLLWTFIKSFQALPYVAL  | 1033 |
| 5g jw.pdb_1291 | FRVMRLIKLLSRAEGVRTLLWTFIKSFQALPYVAL  | 1048 |
| 5g jv.pdb_1276 | LIVMLFFIYAVIGMQMFGKIALVDGTQINRNNNFQ  | 1068 |
| 5g jw.pdb_1291 | LIVMLFFIYAVIGMQMFGKIALVDGTQINRNNNFQ  | 1083 |
| 5g jv.pdb_1276 | TFPQAVLLLFRCATGEAWQEILLACSYGKLCDPES  | 1103 |
| 5g jw.pdb_1291 | TFPQAVLLLFRCATGEAWQEILLACSYGKLCDPES  | 1118 |



|                |                                     |      |
|----------------|-------------------------------------|------|
| 5g jv.pdb_1276 | DYAPGEEYTCGTNFAYYYFISFYMLCAFLIINLFV | 1138 |
| 5g jw.pdb_1291 | DYAPGEEYTCGTNFAYYYFISFYMLCAFLIINLFV | 1153 |
| 5g jv.pdb_1276 | AVIMDNFDYLTRDWSILGPHHLDEFKAIWAEYDPE | 1173 |
| 5g jw.pdb_1291 | AVIMDNFDYLTRDWSILGPHHLDEFKAIWAEYDPE | 1188 |
| 5g jv.pdb_1276 | AKGRIKHLDVVTLLRRIQPPLGFGKFCPHRVACKR | 1208 |
| 5g jw.pdb_1291 | AKGRIKHLDVVTLLRRIQPPLGFGKFCPHRVACKR | 1223 |
| 5g jv.pdb_1276 | LVGMNMPLNSDGTVTFNATLFALVRTALKIKTEGN | 1243 |
| 5g jw.pdb_1291 | LVGMNMPLNSDGTVTFNATLFALVRTALKIKTEGN | 1258 |
| 5g jv.pdb_1276 | FEQANEELRAIIKKIWKRTSMKLLDQVIPPIGD   | 1276 |
| 5g jw.pdb_1291 | FEQANEELRAIIKKIWKRTSMKLLDQVIPPIGD   | 1291 |

☐ non conserved

☒ ≥ 50% conserved

**Figure 1.4** Amino acid sequence alignment of PDB IDs **5GJV** and **5GJV** (both extracted from their respective PDB files with an in-house python script, supplementary file **extract-aa.py**).

The protein data bank (PDB) currently holds over 150,000 (As of March 20, 2019) biomolecular structures and continues to release new structures on a weekly basis. The PDB is an essential resource to the structural bioinformatics community to develop software that mine, use, categorize, and analyze such data. Here, with L-type voltage-dependent calcium channel  $\text{Ca}_v1.1$  as an example, the four amino acid sequence alignments above raised a few points below,

1. Overall, the  $\text{Ca}_v1.1$  structure (in PDB) is incomplete (as of March 20, 2019), neither for 5GJV (1276 versus 1873), nor for 5GJW (1291 versus 1873).
2. From Figure 1.1, it can be seen that the template sequences (in fasta format) are identical for 5GJV and 5GJW.
3. From Figure 1.2, with **5GJV\_A\_Fasta** as the template sequence, there are a few gaps in the experimentally determined structure of  $\text{Ca}_v1.1$ . For example, in PDB file 5gju.pdb, the atomic coordinates are missing for  $\text{Ca}_v1.1$  residues from Met376 to Trp417 ( $\Delta = 41$ ), and from Ser669 to Val788 ( $\Delta = 119$ ), and from Asp1515 to the end of  $\text{Ca}_v1.1$  ( $\Delta = 358$ ), where  $\Delta$  represents the size of the hole of specific residues, whose atomic coordinates are missing in the PDB files.
4. From Figure 1.3, with **5GJW\_A\_Fasta** as the template sequence, the situation is by and large similar, where there are structurally undetermined regions of  $\text{Ca}_v1.1$ , too.
5. From Figure 1.4, it can be seen that the experimentally determined fragments of  $\text{Ca}_v1.1$  are mostly identical, except for a gap (lines 578 and 594, Figure 1.4) and a few minor genetic variations, too.
